# Supplementary material for: A flexible and conductive connection introduced by cross-linked CNTs between submicron Si@C particles for better performance LIB anode
Source: Royal Society of Chemistry journal article supplement (doi:10.1039/d1na00012h), 2021-01-01
Supplement: d1na00012h1.pdf [file d1na00012h1.pdf]

## Supporting information

### **A flexible and conductive connection introduced by cross-linked CNTs between submicron Si@C particles for better performance LIBs anode**

Qiqi Zhou<sup>a, b, c</sup>, Junhao Liu<sup>a, b, \*</sup>, Xuzhong Gong<sup>a, b, c</sup>, Zhi Wang<sup>a, b, c, \*</sup>

<sup>a</sup> Key Laboratory of Green Process and Engineering, National Engineering Laboratory for Hydrometallurgical Cleaner Production Technology, Institute of Process Engineering, Chinese Academy of Sciences, Beijing 100190, P.R. China

<sup>b</sup> Innovation Academy for Green Manufacture, Chinese Academy of Sciences, Beijing 100190, P.R. China

<sup>c</sup> School of Chemical Engineering, University of Chinese Academy of Sciences, Beijing 100049, P.R. China

\* Corresponding author:

Junhao Liu, PhD, Associate Professor

Email: [jhliu@ipe.ac.cn](mailto:jhliu@ipe.ac.cn)

Zhi Wang, PhD, Professor

Email: [zwang@ipe.ac.cn](mailto:zwang@ipe.ac.cn)

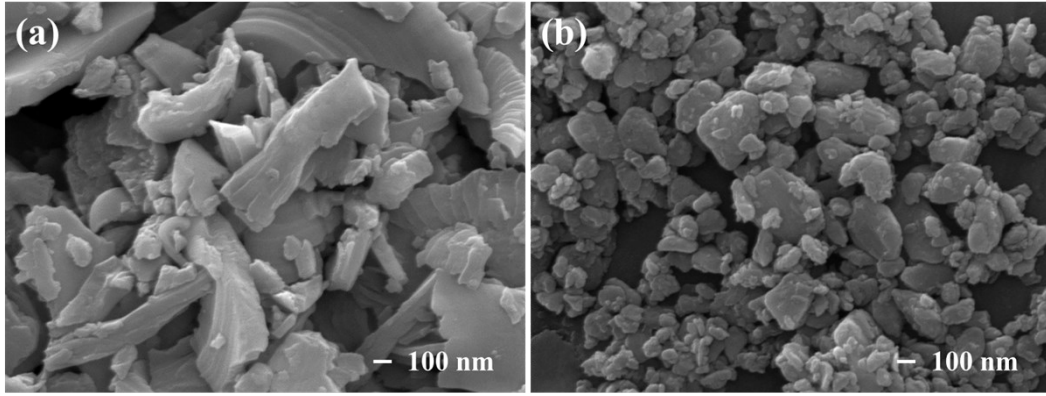

Fig. S1. SEM images of (a) raw materials from wafer silicon slicing process. (b) Silicon materials after post-treatment.

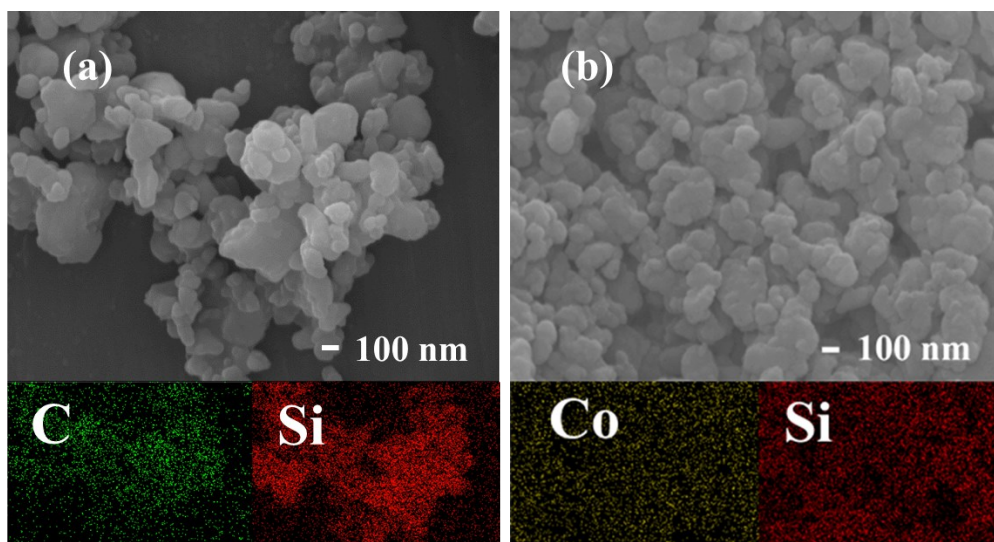

Fig. S2. (a) SEM images of Si@C and (b) Si@C@Co(OH)<sub>2</sub>.

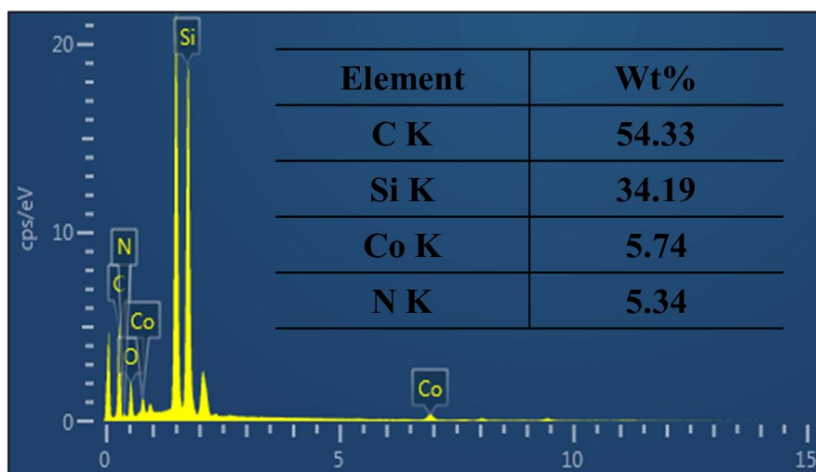

Fig. S3. EDX spectrum of Si@C/CNTs.

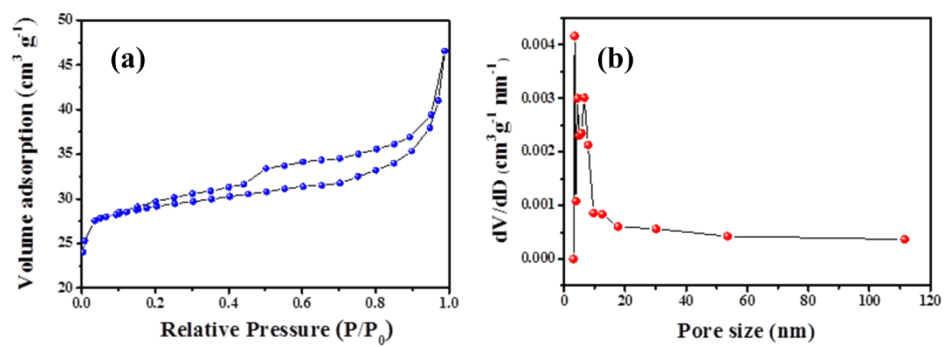

Fig.S4. (a) The nitrogen adsorption/desorption isotherm and (b) the pore size distributions for Si@C/CNTs.

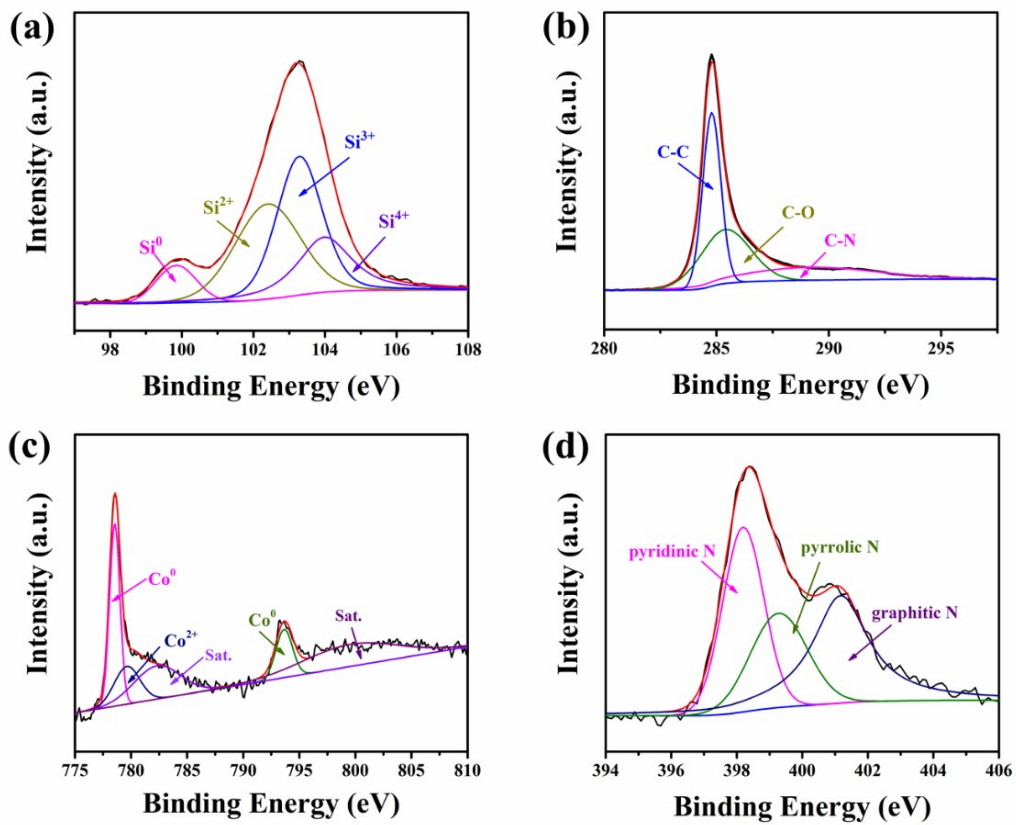

Fig. S5. (a) Si 2p spectrum, (b) C 1s spectrum, (c) Co 2p spectrum and (d) N 1s spectrum of Si@C/CNTs.

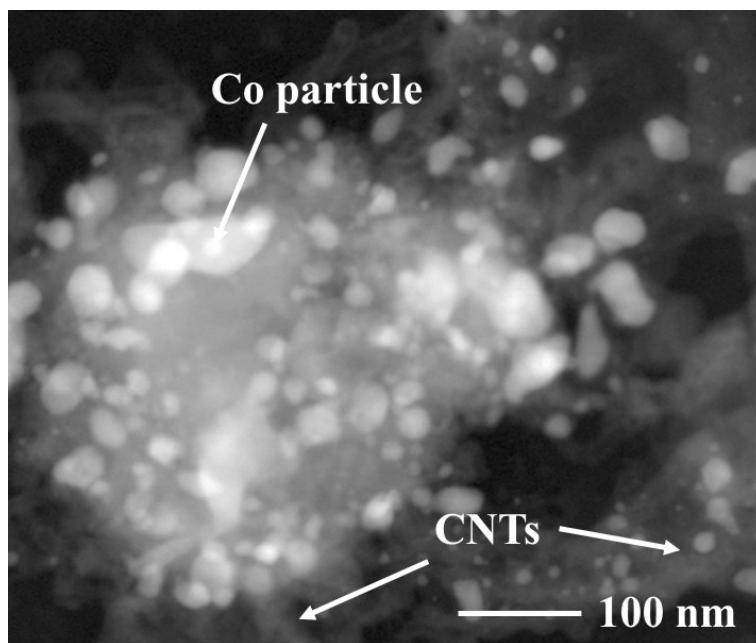

Fig. S6. TEM image of Si@C/CNTs

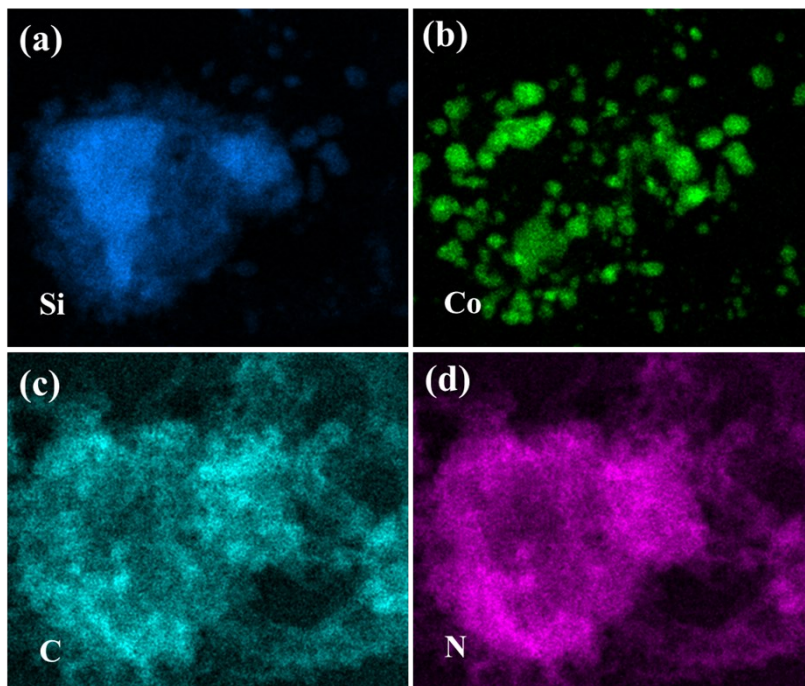

Fig. S7. EDX mapping images for Fig. S6



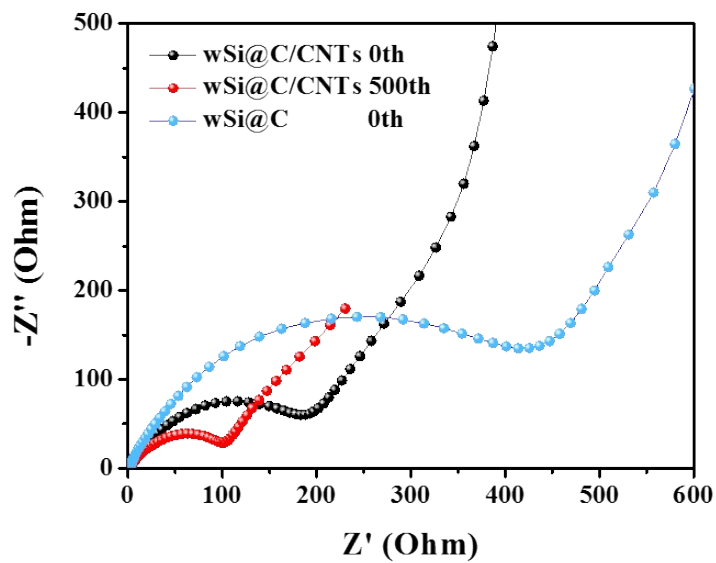

Fig. S8. Nyquist plots of Si@C electrode and Si@C/CNTs electrode in fresh state and Si@C/CNTs electrode after 500 cycles. (e)

Table S1. Percentage of Pyridinic N, Pyrrolic N and Graphitic N of Si@C/CNTs from high-resolution XPS spectra.

|                  | Pyridinic N | Pyrrolic N | Graphitic N |
|------------------|-------------|------------|-------------|
| Percentage(% wt) | 34.8        | 24.4       | 40.8        |

Table S2. Comparison of the electrochemical performance of photovoltaic waste Si based electrode for lithium-ion batteries.

| Sample                 | Current density<br>(A g <sup>-1</sup> ) | Cycling stability<br>(mAh g <sup>-1</sup> ) | Refs.     |
|------------------------|-----------------------------------------|---------------------------------------------|-----------|
| Si@C/CNTs              | 0.5                                     | 1000.7 (500 cycles)                         | This work |
| sm-Si@C/Gr             | 1.0                                     | 1192 (100 cycles)                           | 1         |
| Si@C-G                 | 0.1                                     | 401 (100 cycles)                            | 2         |
| Si-kerf electrode      | C/5                                     | ~1000 (300 cycles)                          | 3         |
| Si-Ni anode            | 0.05                                    | 915 (90 cycles)                             | 4         |
| Si-GR composite        | 0.2                                     | ~1050 (50 cycles)                           | 5         |
| Si-MP/Carbon composite | 0.5                                     | 800 (100 cycles)                            | 6         |
| NanoSi@G               | 0.45                                    | 1138 (150 cycles)                           | 7         |
| C-Si composite         | 0.3                                     | 880 (51 cycles)                             | 8         |

## References

- 1 B. Lee, T. Liu, S. K. Kim, H. K. Chang, K. Eom, L. X. Xie, S. Chen, H. D. Jang, S. W. Lee, Submicron silicon encapsulated with graphene and carbon as a scalable anode for lithium-ion batteries, *Carbon*, 2017, 119, 438-445.
- 2 S. Y. Zhang, J. Xie, C. Y. Wu, X. B. Zhao, A low-cost preparation of Si@C composite anode from Si photovoltaic waste, *Inter. J. Electrochem. Sci.*, 2020, 15, 6582-6595.
- 3 N. P. Wagne, A. Tron, J. R. Tolchard, G. Nioa, M. P. Bellman, Silicon anodes for lithium-ion batteries produced from recovered kerf powders, *J. Power Sources*, 2019, 414, 486-494.
- 4 C. J. Chen, T. Mori, A. Jena A, H. Y. Lin, N. H. Yang, N. L. Wu, H. Chang, S. F. Hu, R. S. Liu, Optimizing the Lithium Phosphorus Oxynitride Protective Layer Thickness on Low-Grade Composite Si-Based Anodes for Lithium-Ion Batteries, *ChemistrySelect*, 2018, 3, 729-735.
- 5 S. K. Kim, H. Kim, H. Chang, B. G. Cho, J. X. Huang, H. Yoo, H. Kim, H. D. Jang, One-step formation of silicon-graphene composites from silicon sludge waste and graphene oxide via aerosol process for lithium ion batteries, *Sci. Rep.*, 2016, 6, 1-8.
- 6 H. G. Tan, J. G. Duh, Processing silicon microparticles recycled from wafer waste via Rapid Thermal Process for lithium-ion battery anode

materials, *J. Power Sources*, 2016,335, 146-154.

- 7 Q. Bao, Y. H. Huang, C. K. Lan, B. H. Chen, J. G. Duh, Scalable upcycling silicon from waste slicing sludge for high-performance lithium-ion battery anodes, *Electrochim. Acta*, 2015,173, 82-90.
- 8 C.Y. Chou, J. R. Kuo, S. C. Yen, Silicon-based composite negative electrode prepared from recycled silicon-slicing slurries and lignin/lignocellulose for Li-ion cells, *ACS Sustain. Chem. Eng.*, 2018, 6, 4759-4766.
